# Supplementary material
Source: MDPI journal article supplement (https://www.mdpi.com/2071-1050/10/12/4642)
Supplement: s1 [file s1]

## Supplementary

Second-order polynominal to measured cumulative infiltration versus the square root of time ( $t^{0.5}$ ) (b) and by fitting a linear equation to measured infiltration rate versus  $1 / (2t^{0.5})$  (d).

| Treatments | Cumulative Evaporation     | Infiltration Rate      |
|------------|----------------------------|------------------------|
| Control    | $y = 0.2195x^2 + 1.151x$   | $y = 2.5476x + 0.5234$ |
|            | $R^2 = 0.9998$             | $R^2 = 0.9944$         |
| B 1        | $y = 0.1302x^2 + 1.6264x$  | $y = 3.2648x + 0.5963$ |
|            | $R^2 = 0.9998$             | $R^2 = 0.996$          |
| B 2        | $y = -0.0217x^2 + 1.9674x$ | $y = 3.5698x + 0.5635$ |
|            | $R^2 = 0.9918$             | $R^2 = 0.9801$         |
| B 3        | $y = 0.0849x^2 + 1.2972x$  | $y = 2.7457x + 0.4167$ |
|            | $R^2 = 0.9996$             | $R^2 = 0.9932$         |
| B 4        | $y = 0.0629x^2 + 1.5562x$  | $y = 3.0512x + 0.5124$ |
|            | $R^2 = 0.9997$             | $R^2 = 0.9937$         |
| P 1        | $y = 0.074x^2 + 0.8886x$   | $y = 1.9366x + 0.2897$ |
|            | $R^2 = 0.9996$             | $R^2 = 0.9924$         |
| P 2        | $y = 0.0489x^2 + 0.7989x$  | $y = 1.7351x + 0.2425$ |
|            | $R^2 = 0.9996$             | $R^2 = 0.9914$         |
| P 3        | $y = 0.0466x^2 + 0.5567x$  | $y = 1.2236x + 0.1815$ |
|            | $R^2 = 0.9988$             | $R^2 = 0.9902$         |
| P 4        | $y = 0.0623x^2 + 0.5566x$  | $y = 1.2289x + 0.2023$ |
|            | $R^2 = 0.9986$             | $R^2 = 0.9907$         |
| B 1 : P 1  | $y = 0.063x^2 + 0.9477x$   | $y = 1.974x + 0.3073$  |
|            | $R^2 = 0.9996$             | $R^2 = 0.9896$         |
| B 2 : P 2  | $y = 0.0691x^2 + 0.5552x$  | $y = 1.2524x + 0.2101$ |
|            | $R^2 = 0.9871$             | $R^2 = 0.9799$         |
| B 3 : P 3  | $y = 0.0552x^2 + 0.6437x$  | $y = 1.3108x + 0.2268$ |
|            | $R^2 = 0.9987$             | $R^2 = 0.9826$         |
| B 4 : P 4  | $y = 0.0661x^2 + 0.5418x$  | $y = 1.1022x + 0.2132$ |
|            | $R^2 = 0.9971$             | $R^2 = 0.9761$         |
